# Supplementary material for: Tubulin perturbation leads to unexpected cell wall modifications and affects stomatal behaviour in Populus
Source: J Exp Bot. 2015 Aug 5;66(20):6507–18. doi: 10.1093/jxb/erv383 (PMC4588895; doi:10.1093/jxb/erv383)
Supplement: Supplementary Data [file supp_erv383_jexbot151712_file001.pdf]

**Supplemental Table S1.** Primer information

| Gene                                           | Forward and reverse primers                                                        | Purpose     |
|------------------------------------------------|------------------------------------------------------------------------------------|-------------|
| TUA1                                           | F: GCTCTAGATGAGAGAGTGCATTTCGATTCA<br>R: TCC <u>CCCGG</u> TCAGTACTCATCTCCTTCAT      | Cloning     |
| TUA1dY                                         | F: GCTCTAGATGAGAGAGTGCATTTCGATTCA<br>R: ACGCGT <u>CGACT</u> CACTCATCTCCTTCATCACCAT | Cloning     |
| TUA1dEY                                        | F: GCTCTAGATGAGAGAGTGCATTTCGATTCA<br>R: ACGCGT <u>CGACT</u> CAATCTCCTTCATCACCATCCT | Cloning     |
| TUB9                                           | F: GCTCTAGATGAGAGAAATCCTTCATG<br>R: TCC <u>CCCGG</u> TTAGTTCTCCATAGGCTCTT          | Cloning     |
| TUB15                                          | F: GCTCTAGATGAGAGAAATCCTTCACATTC<br>R: TCC <u>CCCGG</u> GCTAGGCAGCCTCTTCCTCCT      | Cloning     |
| TUA1dY/TUA1dEY transgenes                      | F: GCTCTAGATGAGAGAGTGCATTTCGATTCA<br>R: ATCGCAAGACCGCAACAGG                        | genomic PCR |
| TUB9 transgene                                 | F: GCTCTAGATGAGAGAAATCCTTCATG<br>R: ATCGCAAGACCGCAACAGG                            | genomic PCR |
| TUB15 transgene                                | F: GCTCTAGATGAGAGAAATCCTTCACATTC<br>R: ATCGCAAGACCGCAACAGG                         | genomic PCR |
| Glycosyltransferase<br>(housekeeping)          | F: TTGGGCTTGAGCAAAGTGG<br>R: AGATCCACCCTCCAACAGTG                                  | genomic PCR |
| HPT                                            | F: GAGGGCGAAGAATCTCGTGC<br>R: GATGTTGGCGACCTCGTATTG                                | genomic PCR |
| NPT                                            | F: GAACAAGATGGATTGCACGC<br>R: GAAGAACTCGTCAAGAAGGC                                 | genomic PCR |
| TUA1 endogene                                  | F: CGATGGAGAGGATGGTGATGAAGGA<br>R: CACGTACCAACAGACATGGTCTAAGC                      | qRT-PCR     |
| TUB9 endogene                                  | F: CAGTCATGTTTAGGAGAAARGCGT<br>R: CAACTCATCCTTGAAGCCATRGCC                         | qRT-PCR     |
| TUB15 endogene                                 | F: ACAGCTATGTTCAGGAGGAAGGCT<br>R: TCACACCAGCCACATGGCTTAMTA                         | qRT-PCR     |
| TUA1dY/TUA1dEY transgenes                      | F: CGATGGAGAGGATGGTGATGAAGGA<br>R: TAATCATCGCAAGACCGCAACAG                         | qRT-PCR     |
| TUB9 transgene                                 | F: CAGTCATGTTTAGGAGAAARGCGT<br>R: TAATCATCGCAAGACCGCAACAG                          | qRT-PCR     |
| TUB15 transgene                                | F: ACAGCTATGTTCAGGAGGAAGGCT<br>R: TAATCATCGCAAGACCGCAACAG                          | qRT-PCR     |
| elongation factor 1- $\beta$<br>(housekeeping) | F: GACCTKGTATCAGTGGATTCCCTC<br>R: GAACAGAGGCACAAGATTACCAGG                         | qRT-PCR     |
| actin (housekeeping)                           | F: GCGGTGATGGTGAGTTCTTTCT<br>R: ATCGAGAGGGAGGACCATTACAGT                           | qRT-PCR     |
| actin-related protein<br>(housekeeping)        | F: ACTGTGAGGAGATGCAGAAACGCA<br>R: GCTGTGTCACGGGCATTCAATGYT                         | qRT-PCR     |

**Supplemental Table S2.** Summary of transformation response from multiple trials

| <b>Construct pair</b>       | <b>explant</b> | <b>callus<sup>a</sup></b> | <b>shoot<sup>a</sup></b> | <b>root<sup>a</sup></b> |
|-----------------------------|----------------|---------------------------|--------------------------|-------------------------|
| TUA1+TUB9                   | 106            | 8                         | 1                        | 0                       |
| TUA1+TUB15                  | 100            | 6                         | 1                        | 0                       |
| TUA5+TUB9                   | 98             | 3                         | 0                        | 0                       |
| TUA5+TUB15                  | 100            | 6                         | 1                        | 0                       |
| TUA1dY+TUB9 (A1dYB9)        | 114            | 11                        | 3                        | 1                       |
| TUA1dY+TUB15                | 90             | 10                        | 2                        | 0                       |
| TUA1dEY+TUB9 (A1dEYB9)      | 118            | 15                        | 2                        | 2                       |
| TUA1dEY+TUB15 (A1dEYB15)    | 103            | 17                        | 11                       | 4 <sup>c</sup>          |
| Vector control <sup>b</sup> | 42             | > 15                      | > 5                      | 5                       |

<sup>a</sup>Numbers of putative independent events are shown.

<sup>b</sup>Only subsets of events were advanced through the regeneration process.

<sup>c</sup>One event was later confirmed to contain only the TUA1dEY transgene.

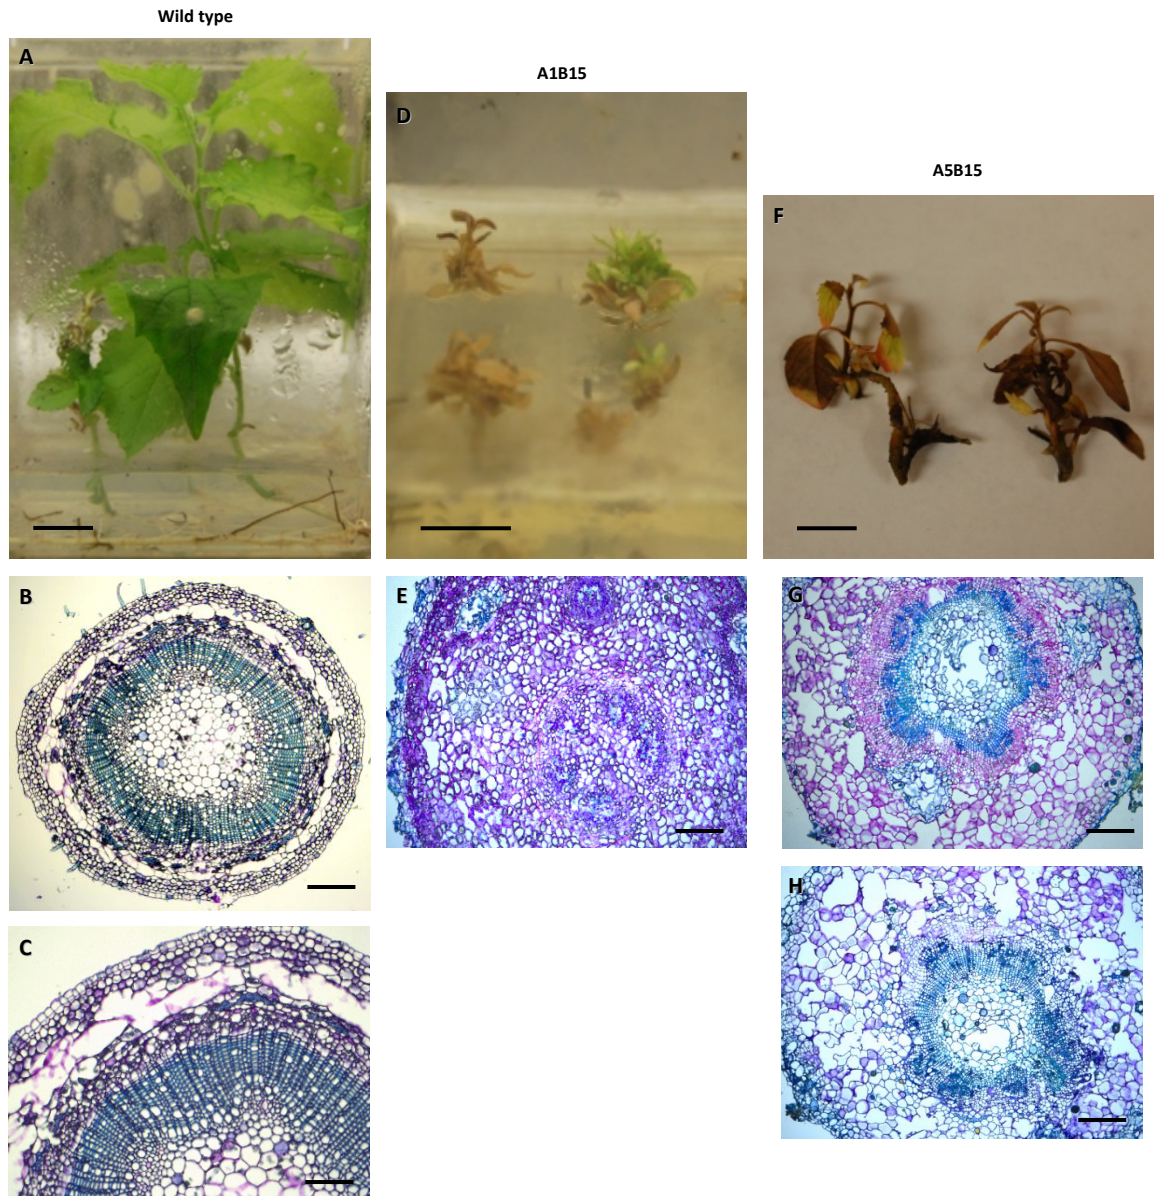

**Supplemental Fig. S1.** Abnormal vascular development was observed in nonviable transgenic lines. A-C, Wild type; D-E, transformants derived from co-transformation of *TUA1* and *TUB15* (A1B15); F-H, transformants derived from co-transformation of *TUA5* and *TUB15* (A5B15). Scale bar = 1 cm (A, D, F), 500  $\mu$ m (B) or 125  $\mu$ m (C, E, G, H).

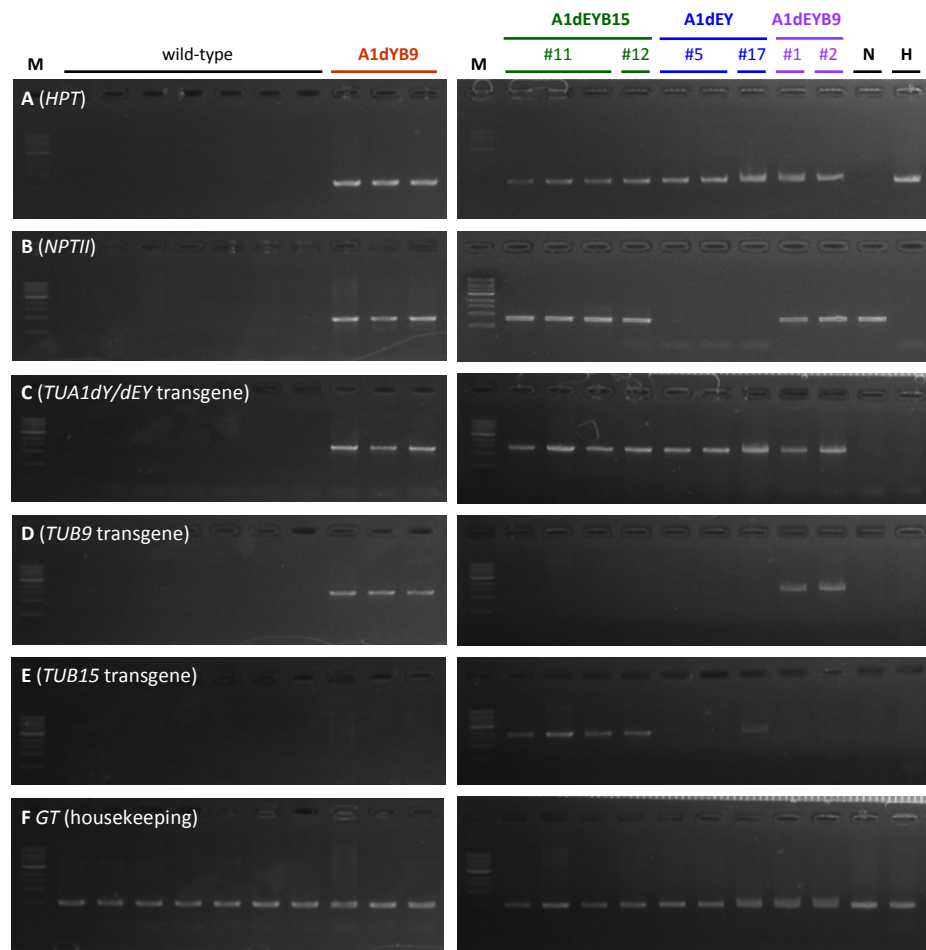

**Supplemental Fig. S2.** PCR analysis of wild-type and transgenic plants using gene-specific primers. (A) Selectable marker hygromycin phospho-transferase (*HPT*) gene from the *TUA* constructs. (B) Selectable marker neomycin phosphotransferase II (*NPTII*) gene from the *TUB* constructs. (C) *TUA1dY/dEY* transgene. (D) *TUB9* transgene. (E) *TUB15* transgene. (F) A single-copy glycosyltransferase (*GT*) gene Potri.016G014500 as housekeeping control. A1dY, *TUA1dY*; A1dEY, *TUA1dEY*; B9, *TUB9*; B15, *TUB15*; M, molecular weight markers; N and H, vector controls with the *NPTII* or *HPT* construct, respectively. The A1dEY #5 and #17 lines was originally obtained from transformation with the A1dEYB15 combination, but found to harbor only the *TUA* and *HPT* transgenes.

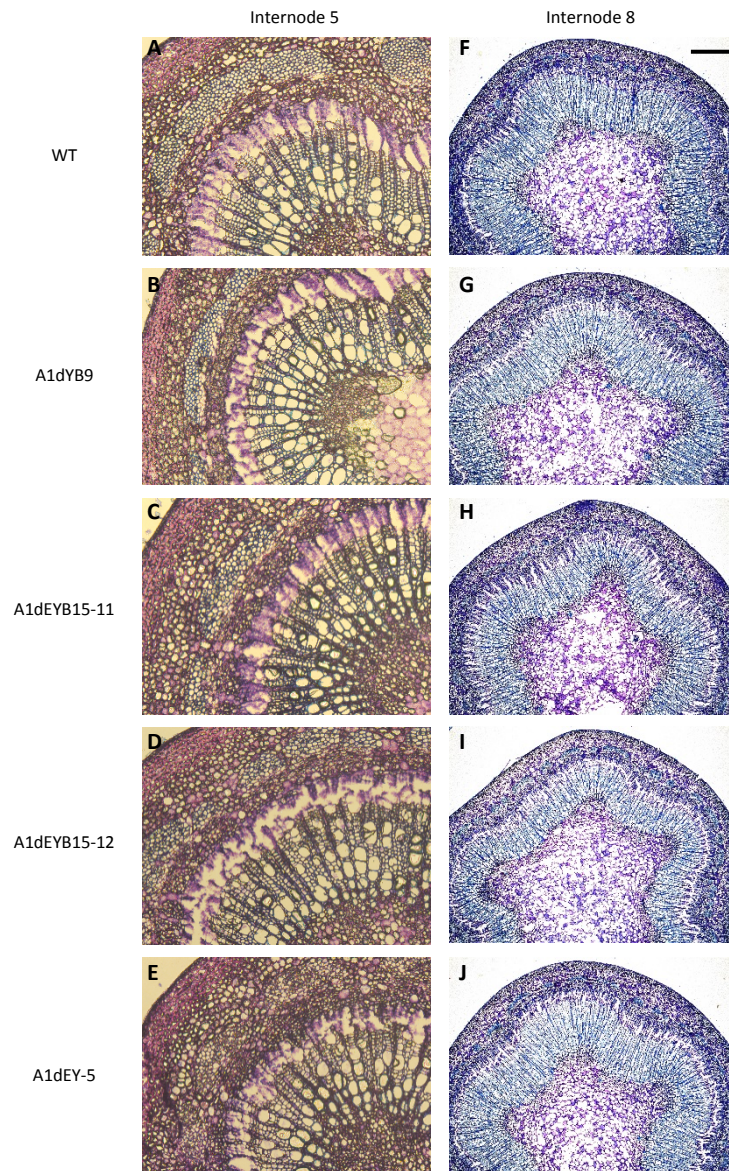

**Supplemental Fig. S3.** Stem cross sections of wild-type and transgenic plants. Paraffin sections (10  $\mu$ m) were stained with toluidine blue and visualized under a light microscope. Scale bar = 125  $\mu$ m (A-E) or 500  $\mu$ m (F-J).

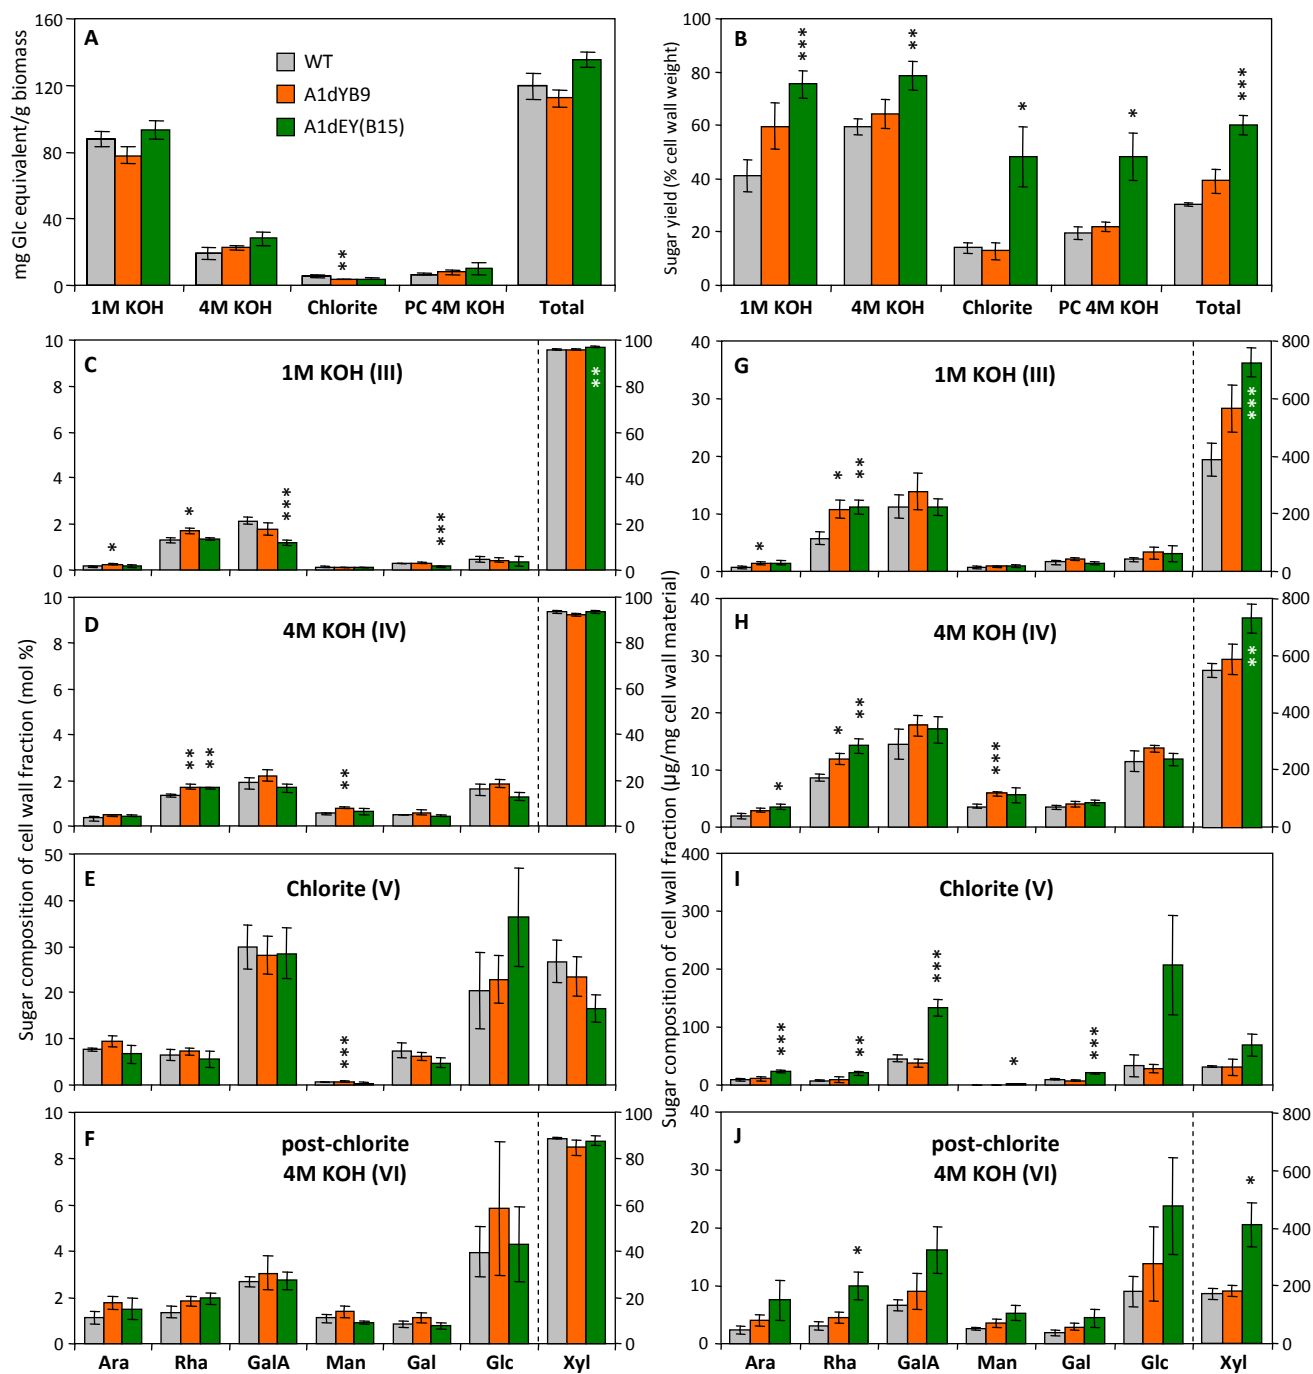

**Supplemental Fig. S4.** Total sugars and glycosyl composition of sequential cell wall extracts of wild-type and transgenic plants. **(A)** Total sugars in each cell wall fraction as measured by the phenol-sulfuric acid method. **(B)** Total sugar yield in each cell wall fraction recovered by methanolysis. **(C-J)** Sugar composition expressed as mol % (C-F) or as µg sugar/g cell wall material (G-J) in each fraction. Data are mean ± SE of n=3-9 in (A) or n= 3-5 in (B-J). Refer to the right axis for Xyl in C, D, F, G, H and J. Statistical significance was determined by two-sample *t*-test (\*\*\* *P* ≤ 0.01; \*\* *P* < 0.05; \* *P* < 0.1).

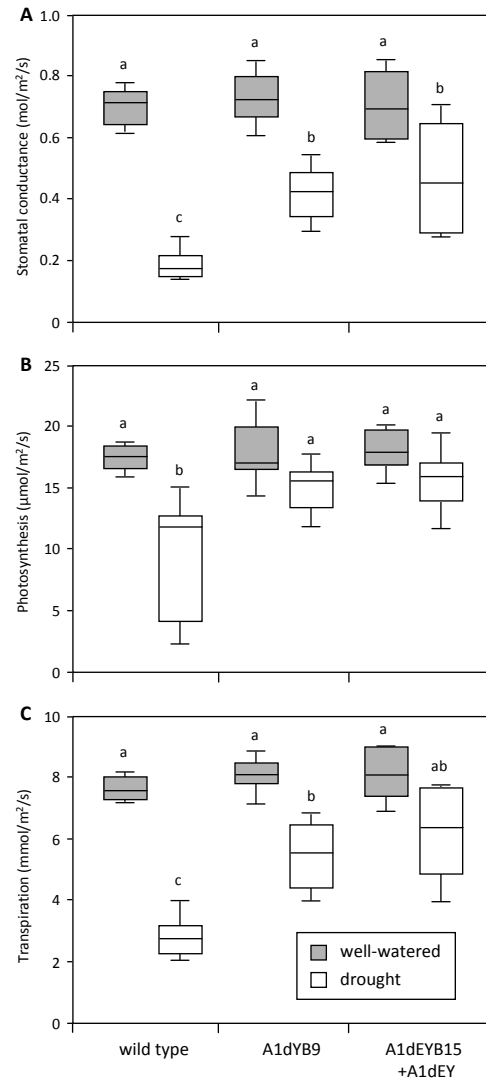

**Supplemental Fig. S5.** Photosynthetic responses of wild-type and transgenic leaves from replicate drought experiments. **(A)** stomatal conductance, **(B)** net photosynthesis, and **(C)** transpiration rates of LPI-15 under well-watered or drought conditions. Statistical significance was determined by one-way ANOVA ( $n = 3$  for WT and 6-7 for the transgenics).
